# Supplementary material for: A strategy to enhance the up-conversion luminescence of nanospherical, rod-like and tube-like NaYF4: Yb3+, Er3+ (Tm3+) by combining with carbon dots
Source: Royal Society of Chemistry journal article supplement (doi:10.1039/d0ce01516d), 2020-11-19
Supplement: d0ce01516d1.pdf [file d0ce01516d1.pdf]

## Supporting Information

### A strategy to enhance the up-conversion luminescence of nanospherical, rod-like and tube-like NaYF<sub>4</sub>: Yb<sup>3+</sup>, Er<sup>3+</sup> (Tm<sup>3+</sup>) through combining carbon dots

Yanyan Wang <sup>a,b,†</sup>, Wei Lu <sup>c,†</sup>, Dan Yue <sup>a</sup>, Mengnan Wang <sup>b</sup>, Boshi Tian <sup>d</sup>, Qingfeng Li <sup>d</sup>, Bin Hu <sup>d</sup>, Zhenling Wang <sup>a\*</sup>, Yilei Zhang <sup>e\*</sup>

*a. Henan International Joint Laboratory of Rare Earth Composite Materials, College of Material Engineering, Henan University of Engineering, Xinzheng 451191, P. R. China.*

*b. College of Chemistry, Zhengzhou University, Zhengzhou 450001, P. R. China.*

*c. University Research Facility in Materials Characterization and Device Fabrication, The Hong Kong Polytechnic University, Hong Kong, P. R. China.*

*d. Henan Key Laboratory of Rare Earth Functional Materials, Zhoukou Normal University, Zhoukou 466001, P. R. China*

*e. Civil & Mechanical Engineering, University of Canterbury, Christchurch 8140, New Zealand*

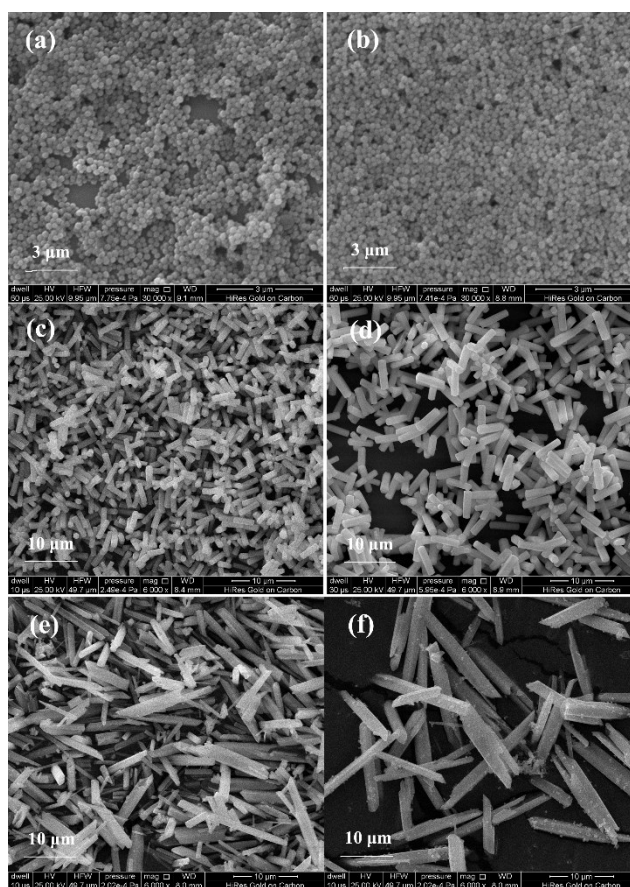

Fig. S1 SEM images of NaYF<sub>4</sub>: Yb<sup>3+</sup>, Tm<sup>3+</sup> (a, c, e) and CDs@NaYF<sub>4</sub>: Yb<sup>3+</sup>, Tm<sup>3+</sup> (b, d, f) with different morphologies: nanospheres (a, b), rod-like (c, d), tube-like (e, f).

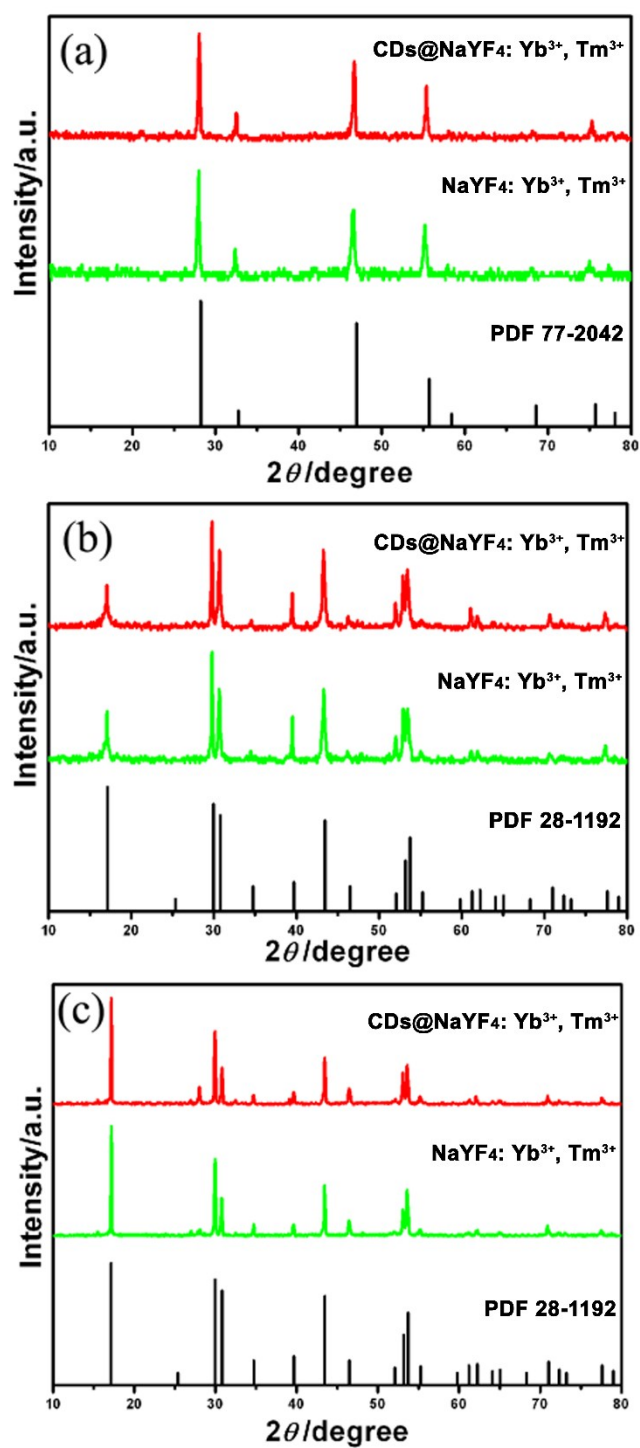

Fig. S2 XRD patterns of NaYF<sub>4</sub>: Yb<sup>3+</sup>, Tm<sup>3+</sup> and CDs@NaYF<sub>4</sub>: Yb<sup>3+</sup>, Tm<sup>3+</sup> with different morphologies: nanospheres (a), rod-like (b), tube-like (c).

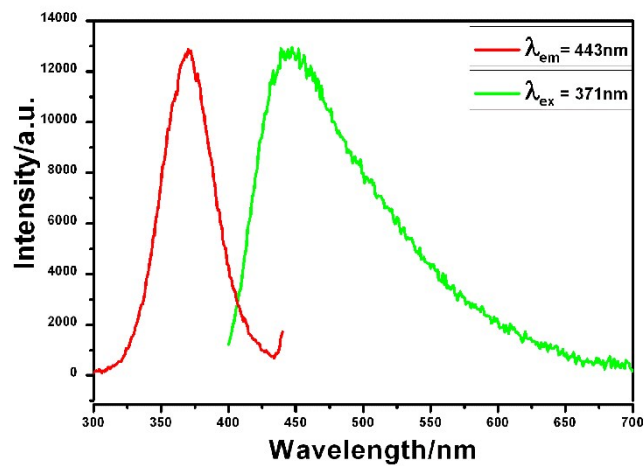

Fig. S3 Excitation (red line) and emission (green line) spectra of CDs.

The excitation spectrum of CDs monitored at 443 nm showed a broad band with maximum at 371 nm, and the emission spectrum showed a broad band with maximum at 443 nm under the excitation of 371 nm.
